# Supplementary material for: SARS-CoV-2 among migrants and forcibly displaced populations: a rapid systematic review
Source: bioRxiv or medRxiv preprint supplement (doi:10.1101/2020.12.14.20248152), 2020-12-14
Supplement: Supplementary file [file media-1.zip]

## APPENDIX A

### Search Queries in PubMed, WoS, Pre-print Servers and Website search

| Search Syntax development (MEDLINE via PubMed) on 26 June 2020 |                                                                                                                                                                                                                                                                                                                                                                                                                                                                                                                                                                                                                                                                                           |         |
|----------------------------------------------------------------|-------------------------------------------------------------------------------------------------------------------------------------------------------------------------------------------------------------------------------------------------------------------------------------------------------------------------------------------------------------------------------------------------------------------------------------------------------------------------------------------------------------------------------------------------------------------------------------------------------------------------------------------------------------------------------------------|---------|
| ID                                                             | Query                                                                                                                                                                                                                                                                                                                                                                                                                                                                                                                                                                                                                                                                                     | Results |
| #11                                                            | #4 AND #9 AND #10                                                                                                                                                                                                                                                                                                                                                                                                                                                                                                                                                                                                                                                                         | 346     |
| #10                                                            | 2019/12/01:2020/06/26[edat]                                                                                                                                                                                                                                                                                                                                                                                                                                                                                                                                                                                                                                                               | 759,959 |
| #9                                                             | #5 OR #6 OR #7 OR #8                                                                                                                                                                                                                                                                                                                                                                                                                                                                                                                                                                                                                                                                      | 845,962 |
| #8                                                             | refugee[tw] OR "asylum seeker"[tw] OR "asyl*" [tw] OR (displaced[tw] AND (person*[tw] OR people[tw])) OR "migra*" [tw] OR "forced migra*" [tw] OR migration[tw] OR immigra*[tw] OR "human migration"[tw] OR stateless[tw] OR "state-less"[tw] OR "irregular migra*" [tw] OR "regular migra*" [tw] OR "undocumented migra*" [tw] OR "internally displaced"[tw] OR "detainees"[tw] OR "residence status"[tw] OR "foreign-born"[tw] OR "displaced person"[tw] OR "noncitizen"[tw] OR "outsider"[tw] OR "newcomer"[tw] OR "newly arrived"[tw] OR "new arrival"[tw] OR "recent entrant"[tw] OR "non national"[tw] OR "non-national"[tw] OR "transient"[tw] OR "minorities"[tw] OR "ethnic"[tw] | 842,865 |
| #7                                                             | "Refugees"[MeSH]                                                                                                                                                                                                                                                                                                                                                                                                                                                                                                                                                                                                                                                                          | 10,151  |
| #6                                                             | "Human Migration"[MeSH]                                                                                                                                                                                                                                                                                                                                                                                                                                                                                                                                                                                                                                                                   | 26,250  |
| #5                                                             | "Transients and Migrants"[MeSH]                                                                                                                                                                                                                                                                                                                                                                                                                                                                                                                                                                                                                                                           | 11,563  |
| #4                                                             | #1 OR #2 OR #3                                                                                                                                                                                                                                                                                                                                                                                                                                                                                                                                                                                                                                                                            | 41,990  |
| #3                                                             | ("corona virus"[tw] OR "corona viruses"[tw] OR coronavir*[tw] OR coronavirus*[tw] OR betacoronavirus*[tw]) AND (novel[tw] OR 2019[tw] OR Wuhan[tw] OR Huanan[tw] OR Hubei[tw]) OR "new coronavirus"[tw] OR "COVID-19"[tw] OR COVID19[tw] OR "SARS coronavirus 2"[tw] OR "severe acute respiratory syndrome coronavirus 2"[tw] OR nCoV[tw] OR 2019nCoV[tw] OR nCoV2019[tw] OR "SARS-CoV-2"[tw] OR "SARS-CoV2"[tw] OR SARSCoV19[tw] OR SARS-CoV19[tw] OR SARS-CoV-19[tw] OR HCoV-19[tw] OR WN-CoV[tw]                                                                                                                                                                                       | 28,644  |
| #2                                                             | "Coronavirus Infections"[Mesh]                                                                                                                                                                                                                                                                                                                                                                                                                                                                                                                                                                                                                                                            | 17,903  |
| #1                                                             | "Coronavirus"[Mesh]                                                                                                                                                                                                                                                                                                                                                                                                                                                                                                                                                                                                                                                                       | 18,272  |

| Search Syntax development (Web of Science Core Collection) on 26 June 2020 |                                                                                                                                                                                                                                                                                                                                                                                                                                                                                                                                                             |           |
|----------------------------------------------------------------------------|-------------------------------------------------------------------------------------------------------------------------------------------------------------------------------------------------------------------------------------------------------------------------------------------------------------------------------------------------------------------------------------------------------------------------------------------------------------------------------------------------------------------------------------------------------------|-----------|
| ID                                                                         | Query                                                                                                                                                                                                                                                                                                                                                                                                                                                                                                                                                       | Results   |
| #4                                                                         | #1 AND #2 Timespan=2019-2020                                                                                                                                                                                                                                                                                                                                                                                                                                                                                                                                | 172       |
| #3                                                                         | #1 AND #2                                                                                                                                                                                                                                                                                                                                                                                                                                                                                                                                                   | 405       |
| #2                                                                         | TS = (refugee OR "asylum seeker" OR "asyl*" OR (displaced AND (person* OR people) ) OR "migra*" OR "forced migra*" OR migration OR immigra* OR "human migration" OR stateless OR "state-less" OR "irregular migra*" OR "regular migra*" OR "undocumented migra*" OR "internally displaced" OR "detainees" OR "residence status" OR "foreign-born" OR "displaced person" OR "noncitizen" OR "outsider" OR "newcomer" OR "newly arrived" OR "new arrival" OR "recent entrant" OR "non national" OR "non-national" OR "transient" OR "minorities" OR "ethnic") | 1,339,608 |
| #1                                                                         | TS = (("corona virus" OR "corona viruses" OR coronavir* OR coronavirus* OR betacoronavirus*) AND (novel OR 2019 OR Wuhan OR Huanan OR Hubei) OR "new coronavirus" OR "COVID-19" OR COVID19 OR "SARS coronavirus 2" OR "severe acute respiratory syndrome coronavirus 2" OR nCoV OR 2019nCoV OR nCoV2019 OR "SARS-CoV-2" OR "SARS-CoV2" OR SARSCoV19 OR SARS-CoV19 OR SARS-CoV-19 OR HCoV-19 OR WN-CoV OR "corona vir*" OR "coronavir*" OR "betacoronavir*" OR "severe acute respiratory syndrome coronavirus")                                              | 26,076    |

| Seaches in Pre-print servers and websites                                                                                                                                                                                       |                                                                                                                                                                                                                                                                                                                                                                                                       |      |                          |
|---------------------------------------------------------------------------------------------------------------------------------------------------------------------------------------------------------------------------------|-------------------------------------------------------------------------------------------------------------------------------------------------------------------------------------------------------------------------------------------------------------------------------------------------------------------------------------------------------------------------------------------------------|------|--------------------------|
| Source                                                                                                                                                                                                                          | Search expression                                                                                                                                                                                                                                                                                                                                                                                     | Hits | Date                     |
| medRxiv via <a href="https://www.medrxiv.org/">https://www.medrxiv.org/</a>                                                                                                                                                     | ""refugee" OR "migrants" OR "asylum seeker" OR "IDP"" and posted between "01 Dec, 2019 and 26 Jun, 2020"                                                                                                                                                                                                                                                                                              | 187  | 26 June 2020             |
| medRxiv via <a href="https://www.medrxiv.org/">https://www.medrxiv.org/</a>                                                                                                                                                     | for term ""refugee" OR "migrants" OR "asylum seeker" OR "IDP" AND "COVID-19"" and posted between "01 Dec, 2019 and 26 Jun, 2020"                                                                                                                                                                                                                                                                      | 6    | 26 June 2020             |
| bioRxiv via <a href="https://www.medrxiv.org/">https://www.medrxiv.org/</a>                                                                                                                                                     | ""refugee" OR "migrants" OR "asylum seeker" OR "IDP"" AND "COVID-19"" and posted between "01 Dec, 2019 and 26 Jun, 2020"                                                                                                                                                                                                                                                                              | 4    | 26 June 2020             |
| WHO COVID research<br><a href="https://search.bvsalud.org/global-literature-on-novel-coronavirus-2019-ncov/advanced/?lang=en">https://search.bvsalud.org/global-literature-on-novel-coronavirus-2019-ncov/advanced/?lang=en</a> | tw:( (tw:(migra*)) OR (tw:(refugee*)) OR (tw:(idp))) AND la:("en" OR "de") AND (year_cluster:[2019 TO 2020])                                                                                                                                                                                                                                                                                          | 174  | 29 June 2020             |
| EUPHA<br><a href="https://eupha.org/recent-news">https://eupha.org/recent-news</a> ;<br><a href="https://eupha.org/covid---19-updates">https://eupha.org/covid---19-updates</a>                                                 | Website search function (strg+f, search terms "refugee" OR "migrant" OR "asylum" OR "displaced" OR "forced migration" OR "migration" OR "migra" OR "regular" OR "irregular" OR "undocumented" OR "foreign" OR "international" OR "ethnic" OR "minorit*" OR "stateless" OR "residen*" OR "non-citizen") and key words for COVID-19/SARS-CoV2 exposure (see above), manual check for relevant documents | 13   | 25 June 2020             |
| IOM<br><a href="https://migrationhealthresearch.iom.int/">https://migrationhealthresearch.iom.int/</a> ;<br><a href="https://gmdac.iom.int/">https://gmdac.iom.int/</a> ;                                                       | Website search function (strg+f, search terms "refugee" OR "migrant" OR "asylum" OR "displaced" OR "forced migration" OR "migration" OR "migra*" OR "regular" OR "irregular" OR "undocumented" OR "foreign" OR "international" OR "ethnic" OR "minorit*" OR "stateless" OR "residen*" OR "non-citizen") and key words for exposure (see above), manual check for relevant documents                   | 64   | 25 June 2020             |
| NIPH Live map COVID-19 evidence:<br><a href="https://www.nornesk.no/forskningskart/NIPH_mainMap.html">https://www.nornesk.no/forskningskart/NIPH_mainMap.html</a>                                                               | Search filter: "ethnicity" (no results in other categories refugee camps, other, other groups)                                                                                                                                                                                                                                                                                                        | 7    | 25 June and 29 June 2020 |
