# Supplementary material for: SARS-CoV-2 among migrants and forcibly displaced populations: a rapid systematic review
Source: bioRxiv or medRxiv preprint supplement (doi:10.1101/2020.12.14.20248152), 2020-12-14
Supplement: Supplementary file [file media-4.zip]

## APPENDIX C2

### Risk of Bias Assessment for modelling studies

| Study information |            |              | Model structure                                              |                                                               |
|-------------------|------------|--------------|--------------------------------------------------------------|---------------------------------------------------------------|
| Reviewer initials | Checked by | Study ID     | 1. Are the structural assumptions transparent and justified? | 1. Comments                                                   |
| Overall           | MH/KB      | Irvine 2020  | No to minor concerns                                         | transparent and well jsutified                                |
| Overall           | MH/KB      | Trulove 2020 | No to minor concerns                                         | transparent, but partly they seem very pragmatic              |
| Overall           | MH/KB      | Hariri 2020  | Moderate concerns                                            | partly, the fundamental approach of the model remains unclear |

| 2. Quotes                                                                                                                                                                                                                                                                                                                                                                                                                                                                                                                                                                                                                                                                                 | 2. Are the structural assumptions reasonable given the overall objective, perspective and scope of the model? |
|-------------------------------------------------------------------------------------------------------------------------------------------------------------------------------------------------------------------------------------------------------------------------------------------------------------------------------------------------------------------------------------------------------------------------------------------------------------------------------------------------------------------------------------------------------------------------------------------------------------------------------------------------------------------------------------------|---------------------------------------------------------------------------------------------------------------|
| <i>We implemented a simple stochastic susceptible-exposed-infected-recovered (SEIR) model. In this model, individuals are initially susceptible (S) to COVID-19 infection and become infected and transition to an exposed class (E) at a rate dependent on the reproductive number, known as the <math>R_0</math>, and the proportion of individuals who are currently infectious (I). Individuals in the exposed class then transition to an infectious state (I) after a latent period and, finally, to a recovered state (R) at a constant recovery rate. The SEIR model and related variants support the vast majority of COVID-19 modeling studies around the world at present.</i> | No to minor concerns                                                                                          |
| <i>We used a stochastic Susceptible Exposed Infectious Recovered (SEIR) mathematical model to simulate transmission in this population [15]. To capture the potential variability of transmission possible in this setting, we simulated epidemics under three potential scenarios with different values of the basic reproductive number, <math>R_0</math>:</i>                                                                                                                                                                                                                                                                                                                          | No to minor concerns                                                                                          |
| -                                                                                                                                                                                                                                                                                                                                                                                                                                                                                                                                                                                                                                                                                         | No to minor concerns                                                                                          |

|                                                                              | Input data |                                                        |
|------------------------------------------------------------------------------|------------|--------------------------------------------------------|
| 2. Comments                                                                  | 2. Quotes  | 3. Are the input parameters transparent and justified? |
| assumptions are fitting to current state of knowlegde                        | -          | No to minor concerns                                   |
| assumptions are fitting to current state of knowlegde                        | -          | No to minor concerns                                   |
| different scenarios for different populations and transmissions respectively | -          | No to minor concerns                                   |

| 3. Comments         | 3.Quotes                                                                                                                                                                                                                                                                                                                       | 4. Are the input parameters reasonable? |
|---------------------|--------------------------------------------------------------------------------------------------------------------------------------------------------------------------------------------------------------------------------------------------------------------------------------------------------------------------------|-----------------------------------------|
| -                   | <i>Drawing from the published estimates, we studied three scenarios ranging from a most optimistic to most pessimistic estimate of the R0 as 2.5, 3.5, and 7 for low, medium, and high R0 scenarios, respectively. The incubation and infectious periods were estimated to be 6.4 days [16] and 7 days [17], respectively.</i> | Moderate concerns                       |
| yes, see table 1    | -                                                                                                                                                                                                                                                                                                                              | Moderate concerns                       |
| reported in table 1 | -                                                                                                                                                                                                                                                                                                                              | Moderate concerns                       |

|                                                                                                                                                                                   | Validation (external)                                 |
|-----------------------------------------------------------------------------------------------------------------------------------------------------------------------------------|-------------------------------------------------------|
| 4. Comments                                                                                                                                                                       | 5. Has an external validation process been described? |
| Parameters may not be 1:1 transferable, but the validity of the scenario in terms of its impact (what if this parameter would be present in detention centres) remains unaffected | Moderate concerns                                     |
| Data is taken primarily from Wuhan outbreaks, which raises questions on transferability to crowded camp settings                                                                  | Moderate concerns                                     |
| Heterogeneity of populations not considered                                                                                                                                       | Major concerns                                        |

|                                                                                                                                         |                                                     |              | Validation (internal)                                 |
|-----------------------------------------------------------------------------------------------------------------------------------------|-----------------------------------------------------|--------------|-------------------------------------------------------|
| 5. Comments                                                                                                                             | 6. Has the model been shown to be externally valid? | 6. Comments  | 7. Has an internal validation process been described? |
| No process, most data relies on "real" data, but no external validation per se, especially related to covid data in detention           | Major concerns                                      | not reported | Major concerns                                        |
| In author contributions "Validation" is listed, although ist unsure where ist reffered to. We rate rather moderate than major concerns. | Major concerns                                      | not reported | Moderate concerns                                     |
| not reported                                                                                                                            | Major concerns                                      | not reported | Major concerns                                        |

| 7. Comments                                                                                                                             | 8. Has the model been shown to be internally valid? | 8. Comments                  |
|-----------------------------------------------------------------------------------------------------------------------------------------|-----------------------------------------------------|------------------------------|
| not reported                                                                                                                            | Major concerns                                      | not reported                 |
| In author contributions "Validation" is listed, although ist unsure where ist reffered to. We rate rather moderate than major concerns. | Major concerns                                      | not reported                 |
| no information /not reported                                                                                                            | Major concerns                                      | no information /not reported |

| Uncertainty                                                        |                                                                            | Transparency                                                                                                                                                                |
|--------------------------------------------------------------------|----------------------------------------------------------------------------|-----------------------------------------------------------------------------------------------------------------------------------------------------------------------------|
| 9. Was there an adequate assessment of the effects of uncertainty? | 9. Comments                                                                | 10. Was technical documentation, in sufficient detail to allow (potentially) for replication, made available openly or under agreements that protect intellectual property? |
| Moderate concerns                                                  | Three scenarios, a probabilistic linear approach would have been stronger  | No to minor concerns                                                                                                                                                        |
| Moderate concerns                                                  | 3 scenarios, a more probabilistic scenario would have been stronger        | No to minor concerns                                                                                                                                                        |
| Major concerns                                                     | No confidence intervals for estimates, rigid approach with three scenarios | Major concerns                                                                                                                                                              |



|                                                                                               | OVERALL Risk of Bias: |                                                                                                                                                                                                                 |
|-----------------------------------------------------------------------------------------------|-----------------------|-----------------------------------------------------------------------------------------------------------------------------------------------------------------------------------------------------------------|
| 10. Comments                                                                                  | Judgement             | Comment                                                                                                                                                                                                         |
| Minor concerns as very detailed in the text which allows for replication                      | LOW                   | Overall, this study has a low risk of bias, although validation raises concerns, the model is well reported and Input data is appropriate                                                                       |
| supplement provided and details in methods                                                    | LOW                   | Overall, this study has a low risk of bias, although validation raises concerns and reasonability of input data might be discussed.                                                                             |
| Overall documentation, level of details and methods are not sufficient to allow replicability | HIGH                  | Overall, high risk of bias for major and moderate concerns exist in 8 out of 10 domains. Moreover the replicability of the model as well as the fundamental approach to the model is not sufficiently reported. |
